# Supplementary material for: A new strategy to elaborate polymer composites via Pickering emulsion polymerization of a wide range of monomers
Source: Royal Society of Chemistry journal article supplement (doi:10.1039/c8py01022f), 2018-01-01
Supplement: c8py01022f1.pdf [file c8py01022f1.pdf]

# Supplementary information for: New Strategy to Elaborate Polymer Composites via Pickering Emulsion Polymerization of a large range of monomers

Arthur Werner<sup>1</sup>, Gilles Sèbe<sup>1</sup>, and Valérie Héroguez<sup>1\*</sup>

<sup>1</sup> Laboratoire de Chimie des Polymères Organiques, CNRS UMR5629, IPB-ENSCBP, Université de Bordeaux, Pessac, France

CORRESPONDING AUTHOR Valérie Héroguez, Université de Bordeaux, LCPO, UMR 5629, F-33600 Pessac, France. CNRS, LCPO, UMR 5629, F-33600 Pessac, France

Tel: +33 (0) 5 40 00 22 28

Fax: +33 (0) 5 40 00 84 87

Email: heroguez@enscbp.fr

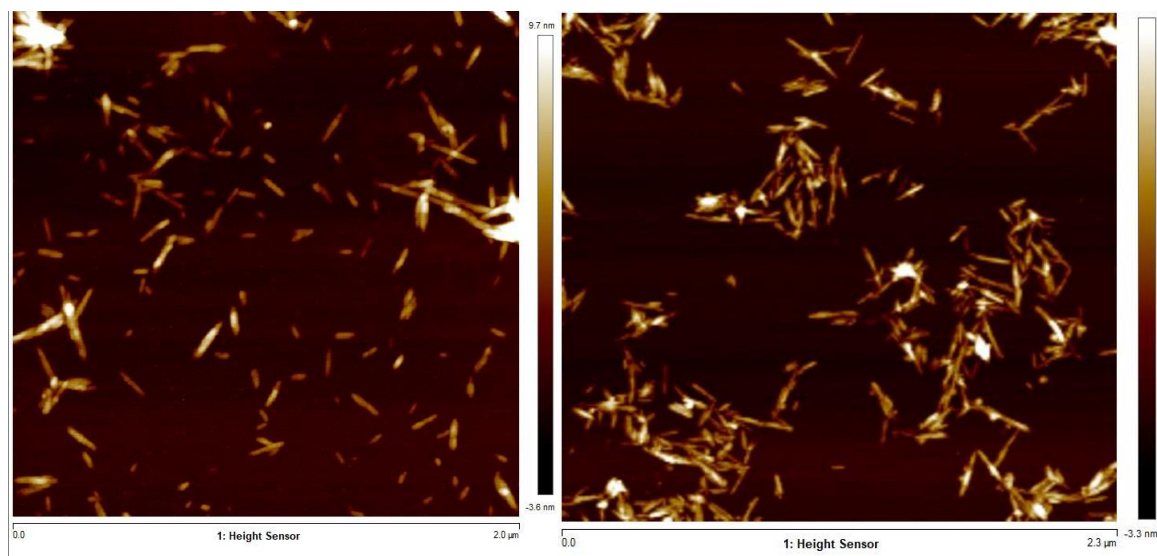

**Figure S1:** AFM topography images of CNCs (left) and CNCAs<sub>10</sub> particles (right).

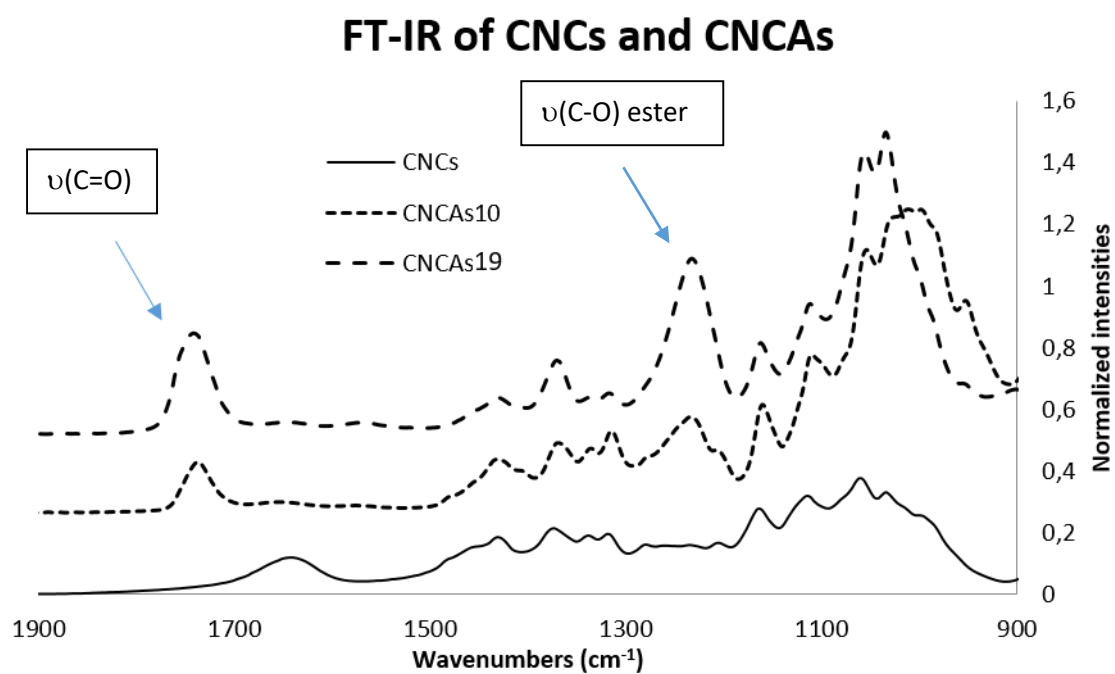

**Figure S2:** Evolution of the C=O and C-O stretching vibrations of the grafted acetyl groups after reaction with vinyl acetate for 15 min (CNCAs<sub>10</sub>) and 45 min (CNCAs<sub>19</sub>).

The percent ratio of grafted acetyl groups relative to the total number of OH groups in the CNCs ( $Ac_{OH}\%$ ) was deduced from the  $I_{C=O}/I_{C-O}$  ratio measured in the FT-IR spectra, using a calibration chart reported in the literature<sup>1</sup>:

$$I_{C=O}/I_{C-O} = 0.0282 \times wt\% \text{ acetyl}$$

Which can be expressed as:

$$wt\% \text{ acetyl} = (I_{C=O}/I_{C-O})/0.0282$$

The percent ratio of acetyl groups relative to the total number of OH groups ( $Ac\%$ ) can be deduced from this equation, using the molecular weight of the anhydroglucose unit ( $162 \text{ g.mol}^{-1}$ ), the molecular weight of acetate function ( $43 \text{ g.mol}^{-1}$ ) and the number of available OH groups per anhydroglucose unit:

$$Ac (\%) = (wt\% \text{ acetyl} \times 162 \times 100) / (3 \times 43) \times (100 - wt\% \text{ acetyl})$$

**Figure S3:** Detailed calculation for the evaluation of the acetyl content in the acetylated particles.

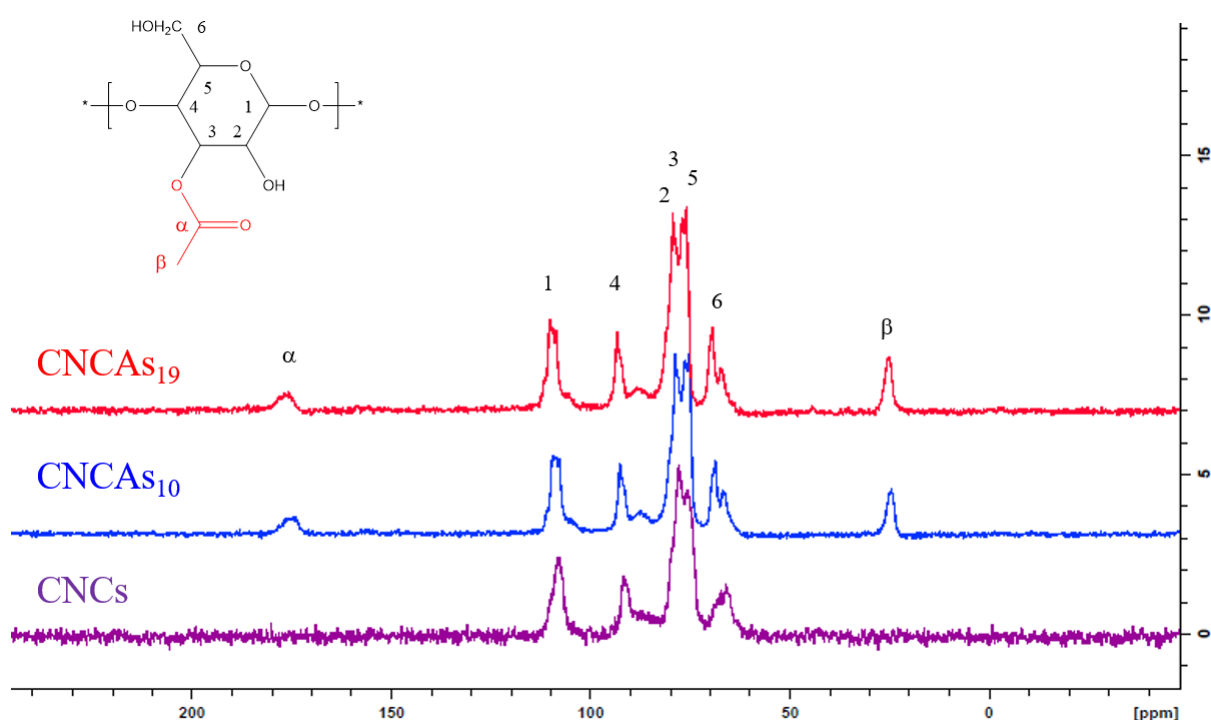

**Figure S4:**  $^{13}\text{C}$  NMR of (purple) non modified CNCs, (blue) CNCAs<sub>10</sub> and (red) CNCAs<sub>19</sub>.

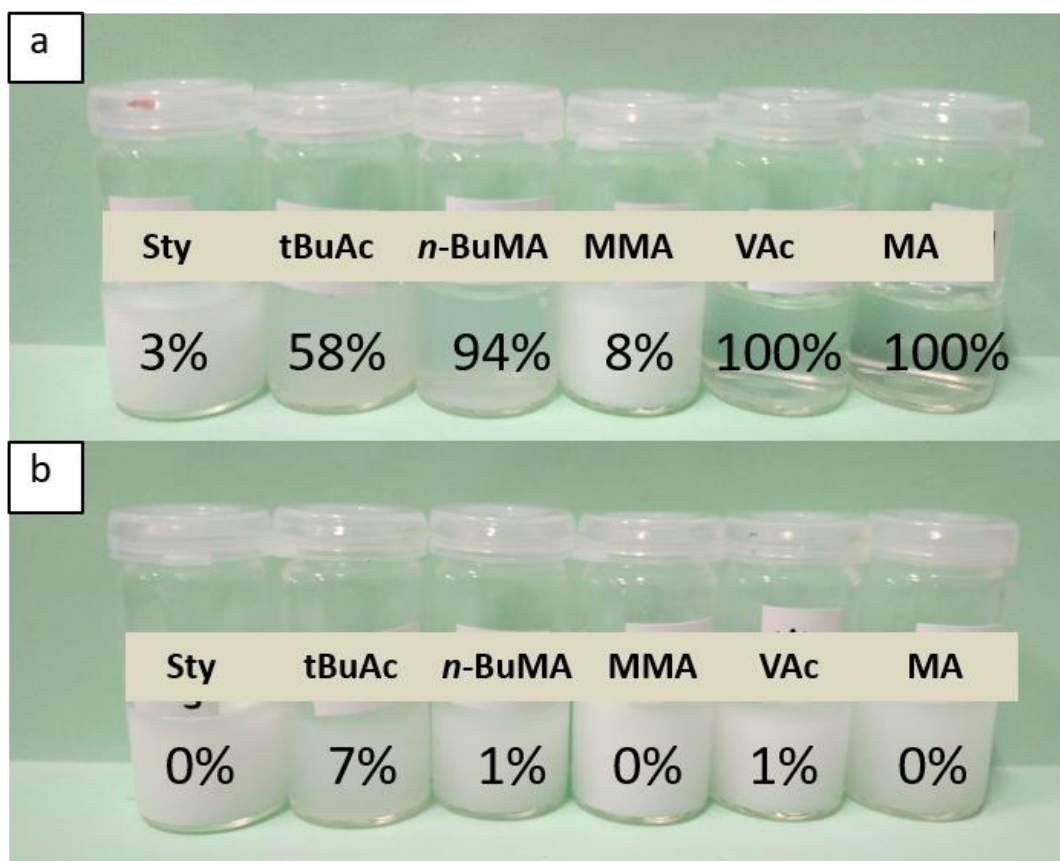

**Figure S5:** Pictures of the latexes obtained after polymerization and filtration of the O/W emulsions of Styrene, tBuAc, n-BuMA, MMA, VAc and MA stabilized by (a) the CNC<sub>s</sub> and (b) the CNCAs<sub>10</sub> particles. The weight percentage of coagulum removed by the filtration step is also given for each sample.

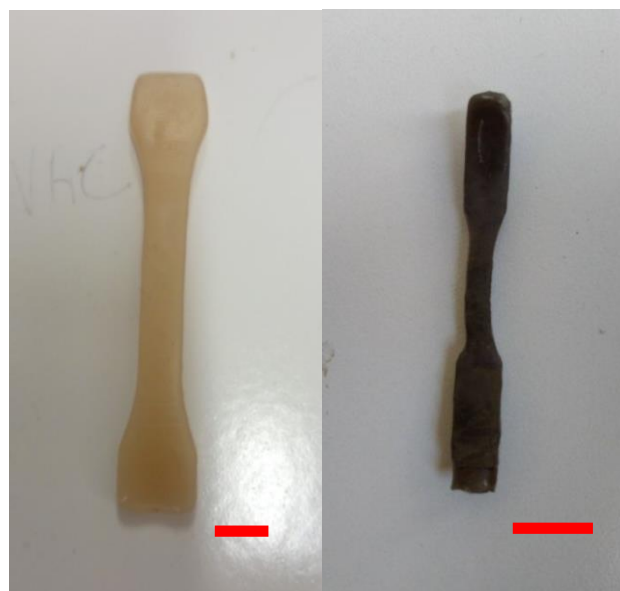

**Figure S6:** Pictures of the shaped PBuMA composite at (a) 160°C, and (b) 180°C. Scale bar is 1 cm.

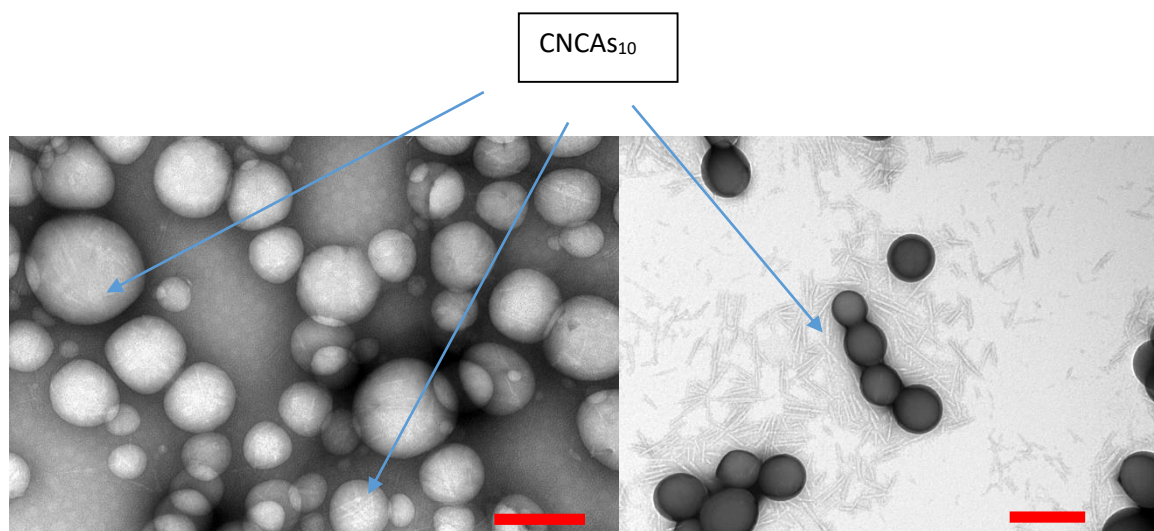

**Figure S7:** TEM micrography of the PS nanolatex covered by the CNCAs<sub>10</sub> particles. Scale bar is 300 nm.
